# Supplementary material
Source: HighWire-hosted journal article supplement (https://srh.bmj.com/content/bmjsrh-2019-200503)
Supplement: inline-supplementary-material-3 [file inline-supplementary-material-3.pdf]

## Supplementary Information 2

## Data Extraction Form

Concerns about disclosing a high-risk cervical human papillomavirus (HPV) infection to a sexual partner: a systematic review and thematic synthesis.

|                                     |        |
|-------------------------------------|--------|
| ID Number (on Excel spreadsheet)    |        |
| Date form completed                 |        |
| Authors                             |        |
| Title                               |        |
| Journal                             |        |
| Year                                |        |
| Volume                              |        |
| Issue                               |        |
| Pages                               |        |
| <b>Participants</b>                 |        |
| HPV status determined?              | YES NO |
| Type of HPV (HR, HR and LR, unsure) |        |
| Number of participants              |        |
| Age range of participants           |        |
| Gender of participants              |        |
| Other relevant sociodemographics    |        |
| <b>Methods</b>                      |        |
| Study design                        |        |
| Aim of study                        |        |
| Recruitment method                  |        |
| Recruitment setting                 |        |
| Outcomes measured                   |        |
| Method(s) of analysis               |        |
| <b>Results</b>                      |        |
| (Psycho)sexual outcomes reported?   | YES NO |
| If yes, give summary of results     |        |
| Disclosure outcomes reported?       | YES NO |
| If yes, give summary of results     |        |
| Other notes                         |        |
